# Supplementary material for: Injectable Thermosensitive Hydrogel Containing Erlotinib‐Loaded Hollow Mesoporous Silica Nanoparticles as a Localized Drug Delivery System for NSCLC Therapy
Source: PubMed Central journal article supplement (PMC7709975; doi:10.1002/advs.202001442), 2020-11-03
Supplement: ADVS-7-2001442-s001.pdf [file ADVS-7-2001442-s001.pdf]

WILEY-VCH

WILEY-VCH

© 2020 Wiley-VCH GmbH

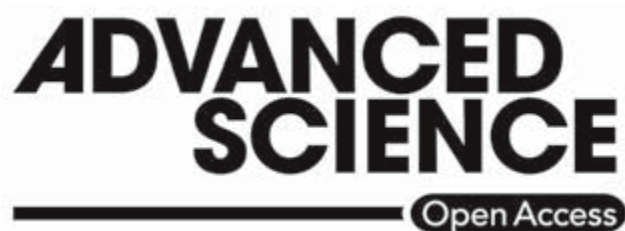

## Supporting Information

for *Adv. Sci.*, DOI: 10.1002/advs.202001442

Injectable Thermosensitive Hydrogel containing Erlotinib-loaded Hollow Mesoporous Silica Nanoparticles as Localized Drug Delivery System for NSCLC Therapy

*Xiaohan Zhou, Xinlong He, Kun Shi, Liping Yuan, Yun Yang, Qingya Liu, Yang Ming, Cheng Yi, Zhiyong Qian\**

## Supporting Information

### Injectable Thermosensitive Hydrogel containing Erlotinib-loaded Hollow Mesoporous Silica Nanoparticles as Localized Drug Delivery System for NSCLC Therapy

Xiaohan Zhou, Xinlong He, Kun Shi, Liping Yuan, Yun Yang, Qingya Liu, Yang Ming, Cheng Yi, Zhiyong Qian\*

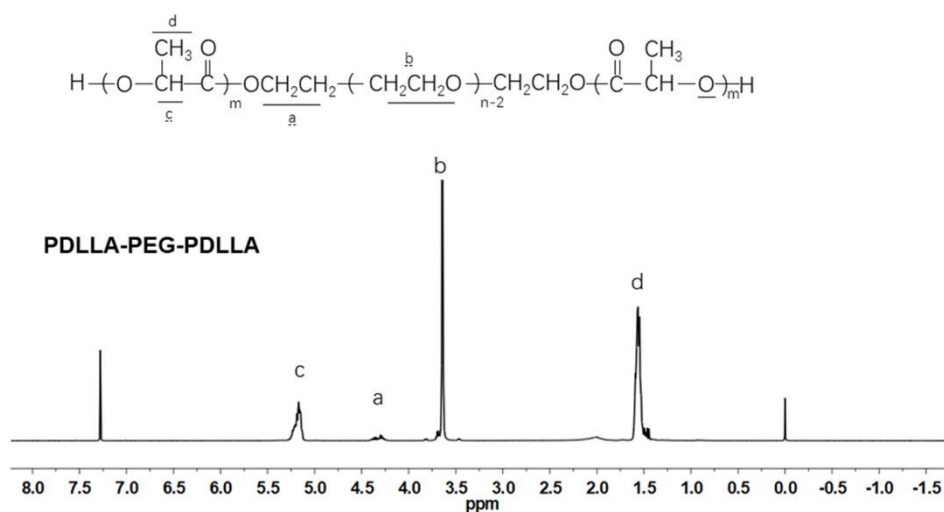

Figure S1. The  $^1\text{H-NMR}$  spectrum of PDLLA-PEG-PDLLA block copolymers in  $\text{CDCl}_3$ .

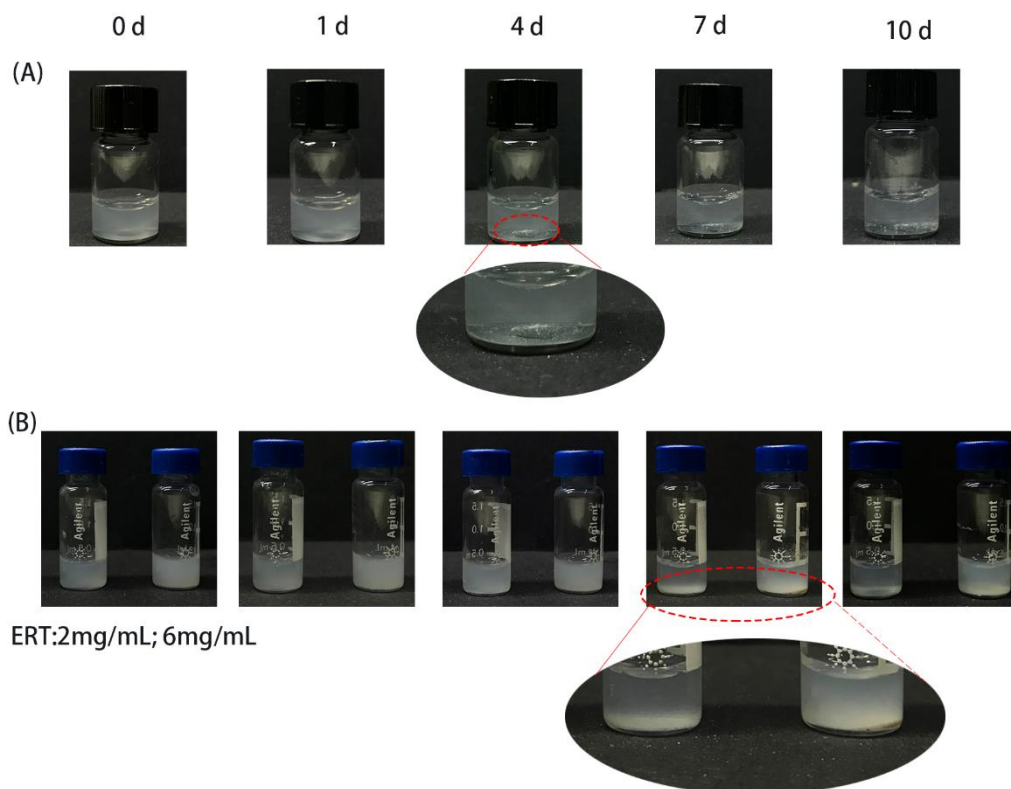

Figure S2. Images of ERT loaded formulations at the indicated time and the images were representative of  $n = 3$  at each time. The hydrophobic ERT powder diffused out of the HMSNs and gel was emphasized by the dashed ellipse in the image.

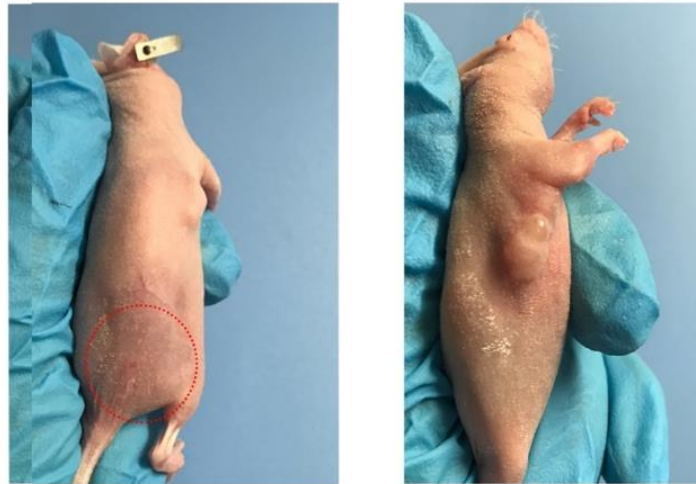

Figure S3. Skin lesions in mice administered high dose Tarceva® (100mg/kg/day).
